# Supplementary material for: Phasic dopamine release in the rat nucleus accumbens predicts approach and avoidance performance
Source: PubMed Central journal article supplement (PMC5095290; doi:10.1038/ncomms13154), 2016-10-27
Supplement: ncomms13154-s1.pdf [file ncomms13154-s1.pdf]

## Supplementary Figure 1

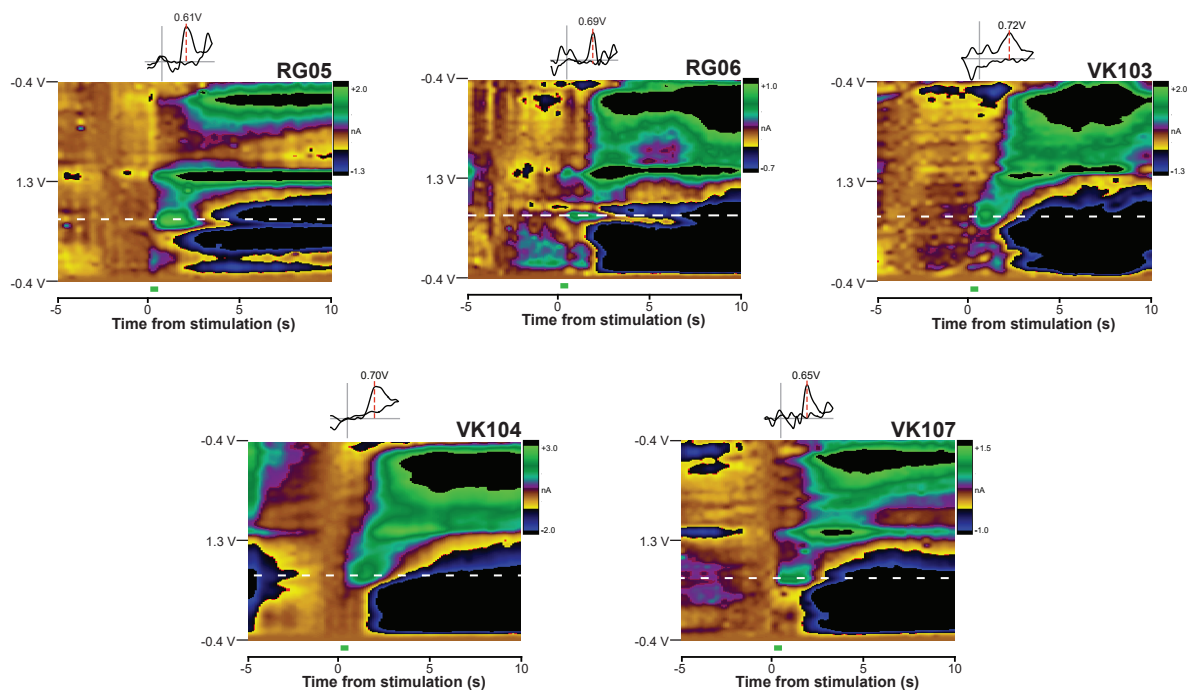

**Supplementary Figure 1.** Additional false-color examples showing dopamine release during five post-session stimulations. False-color plots indicate voltammetric current (z-axis) plotted against applied scan potential (y-axis) and time (x-axis) for representative press trials aligned to stimulation onset ( $t = 0$ ). Examples show dopamine release to the strongest stimulation parameter (1V, 24 pulses at 60 Hz) from the training set for each of five animals.

## Supplementary Figure 2

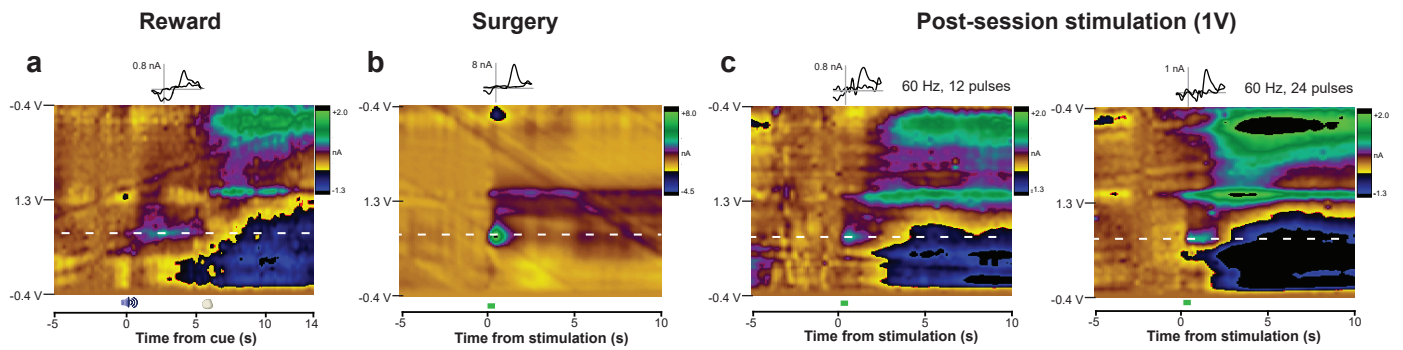

**Supplementary Figure 2.** Additional false-color examples showing dopamine release. False-color plots indicate voltammetric current (z-axis) plotted against applied scan potential (y-axis) and time (x-axis) for representative press trials aligned to cue onset for reward (a), as well as stimulated DA verification trials taken at final depth during surgery (b) and during two post-session stimulations from the session training set (c).

### Supplementary Figure 3

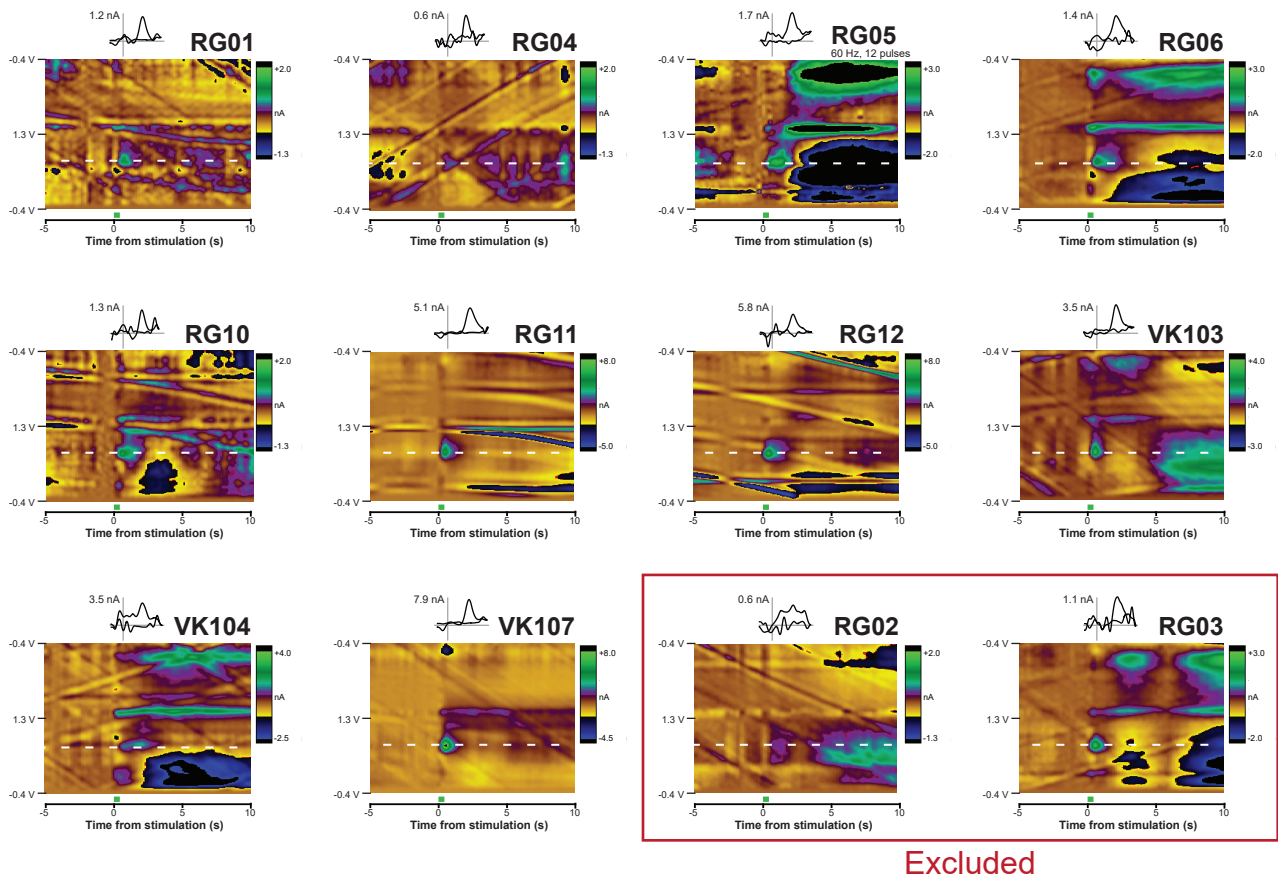

**Supplementary Figure 3.** False-color examples showing stimulated DA verification trials taken at final depth during surgery for all animals used during recordings. False-color plots indicate voltammetric current (z-axis) plotted against applied scan potential (y-axis) and time (x-axis). Two animals were excluded from analyses due to an unreliable waveform (RG02) and the loss of a headcap (RG03).

Supplementary Table 1

**a**  
**Poor Avoiders**

|    |                | Cue Epoch |                |                | Lever Epoch |                |                |
|----|----------------|-----------|----------------|----------------|-------------|----------------|----------------|
|    |                | Reward    | Neutral        | Shock          | Reward      | Neutral        | Shock          |
| PC | R <sup>2</sup> | 0.25(+)   | <b>0.60(-)</b> | <b>0.66(-)</b> | 0.28(+)     | <b>0.66(-)</b> | 0.46(-)        |
|    | p              | 0.1667    | <b>0.0145</b>  | <b>0.0149</b>  | 0.1451      | <b>0.008</b>   | 0.0646         |
| RT | R <sup>2</sup> | 0.08(-)   | <b>0.62(+)</b> | 0.21(+)        | 0.05(-)     | <b>0.76(+)</b> | <b>0.58(+)</b> |
|    | p              | 0.4604    | <b>0.0120</b>  | 0.2557         | 0.5515      | <b>0.0023</b>  | <b>0.0276</b>  |

**b**  
**Good Avoiders**

|    |                | Cue Epoch |         |         | Lever Epoch |         |         |
|----|----------------|-----------|---------|---------|-------------|---------|---------|
|    |                | Reward    | Neutral | Shock   | Reward      | Neutral | Shock   |
| PC | R <sup>2</sup> | 0.23(-)   | 0.00    | 0.28(-) | 0.29(-)     | 0.00    | 0.04(+) |
|    | p              | 0.1889    | 0.8862  | 0.1419  | 0.1350      | 0.9502  | 0.5897  |
| RT | R <sup>2</sup> | 0.07(+)   | 0.08(+) | 0.23(+) | 0.03(+)     | 0.00    | 0.07(-) |
|    | p              | 0.4855    | 0.4490  | 0.1954  | 0.6815      | 0.8589  | 0.4813  |

**Supplementary Table 1.** Correlation between DA release and behavior in poor and good avoiders. R<sup>2</sup> values (top) and p values (bottom) for correlations between DA release during each trial type and behavior during cue and lever epochs for poor (**a**) and good (**b**) avoiders.
